# Supplementary material for: Nocturnal Boundary Layer Height Uncertainty in Particulate Matter Simulations during the KORUS-AQ Campaign
Source: MDPI journal article supplement (doi:10.3390/rs15020300), 2023-01-04
Supplement: s1 [file s1]

Archive with 1 entries (1 files):
- remotesensing-2103513-supplementary.pdf
