# Supplementary material for: Nocturnal Boundary Layer Height Uncertainty in Particulate Matter Simulations during the KORUS-AQ Campaign
Source: MDPI journal article supplement (doi:10.3390/rs15020300), 2023-01-04
Supplement: s1 [file s1 › remotesensing-2103513-supplementary.pdf]

Supplementary Materials for

# Nocturnal Boundary Layer Height Uncertainty in Particulate Matter Simulations during the KORUS-AQ Campaign

Hyo-Jung Lee <sup>1,2</sup>, Hyun-Young Jo <sup>2</sup>, Jong-Min Kim <sup>1</sup>, Juseon Bak <sup>2</sup> and Moon-Soo Park <sup>3</sup>, Jung-Kwon Kim <sup>4</sup>,  
Yu-Jin Jo <sup>5</sup> and Cheol-Hee Kim <sup>1,2,\*</sup>

<sup>1</sup> Department of Atmospheric Sciences, Pusan National University, Busan 46242, Republic of Korea

<sup>2</sup> Institute of Environmental Studies, Pusan National University, Busan 46242, Republic of Korea

<sup>3</sup> Department of Climate and Environment, Sejong University, Seoul 05006, Republic of Korea

<sup>4</sup> Department of Environmental Engineering, Dong-Eui University, Busan 47340, Republic of Korea

<sup>5</sup> Department of Environmental Engineering Science, University of Florida, Gainesville, FL 32611, USA

\* Correspondence: [chkim2@pusan.ac.kr](mailto:chkim2@pusan.ac.kr); Tel.: +82-51-510-3687

## **This file includes:**

Figure S1

Figure S2

Table S1

**Figure S1.** Comparisons of WRF-Chem simulation performance against observed PBLH at Gwanak (P1), Gwangjin (P2), and Jungnang (P3) and measured PM<sub>2.5</sub> at Seoul-Bulgwang.

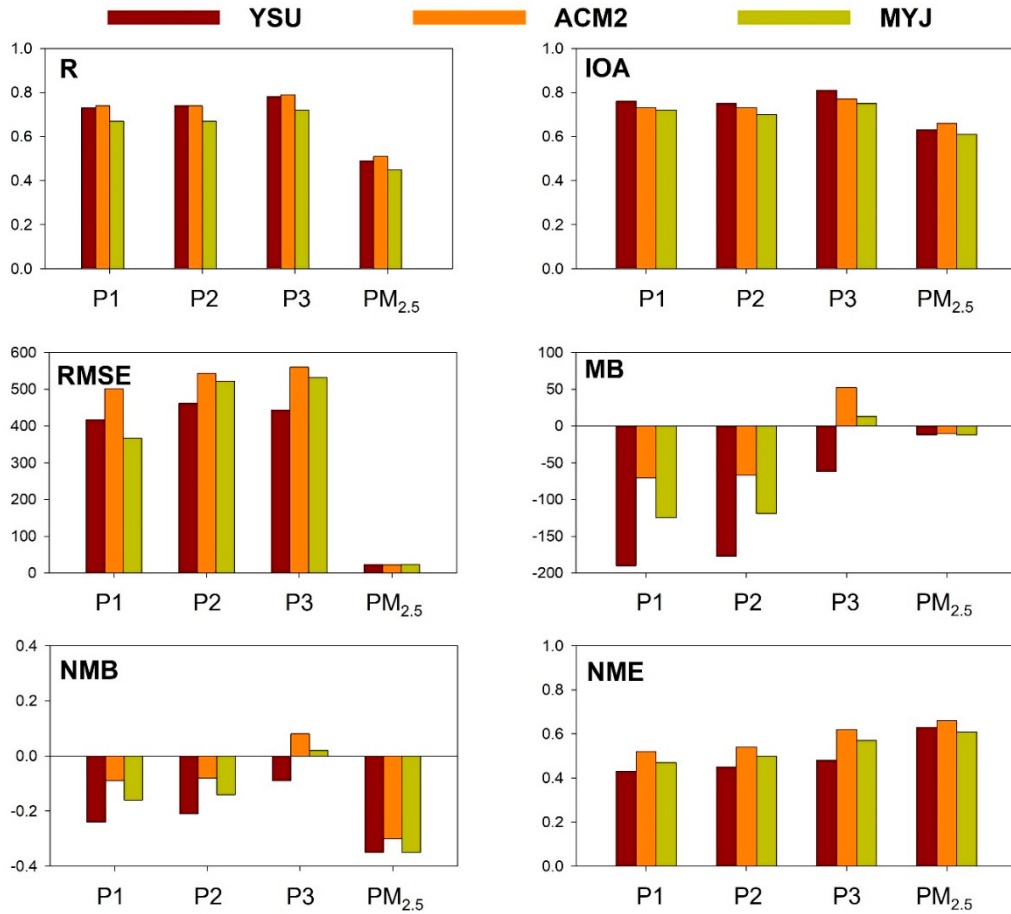

Here, Correlation Coefficient (R) ( $=[\sum(M_i - \bar{M})(O_i - \bar{O})]/[\sum[(M_i - \bar{M})^2 \sum(O_i - \bar{O})^2]^{1/2}]$ ), Normalized Mean Error(NME) ( $=\sum |M_i - O_i|/\sum O_i$ ), Root Mean Square Error (RMSE) ( $=[\sum(M_i - O_i)^2/N]^{1/2}$ ), and Index of Agreement (IOA)( $=1 - \sum(M_i' - O_i')^2/\sum(|M_i'| - |O_i'|)^2$ ) were used. Where  $N$  is the number of pairs of observations/simulations,  $M_i$  is the simulations,  $O_i$  is the observations, and  $\bar{M}$  and  $\bar{O}$  represent the simulated and observed means, and  $M'$  and  $O'$  represent  $M_i - \bar{M}$  and  $O_i - \bar{O}$  respectively.

**Figure S2.** Comparison between PBLH observations at P1 (Gwanak), P2 (Gwangjin) and P3 (Jungnang).

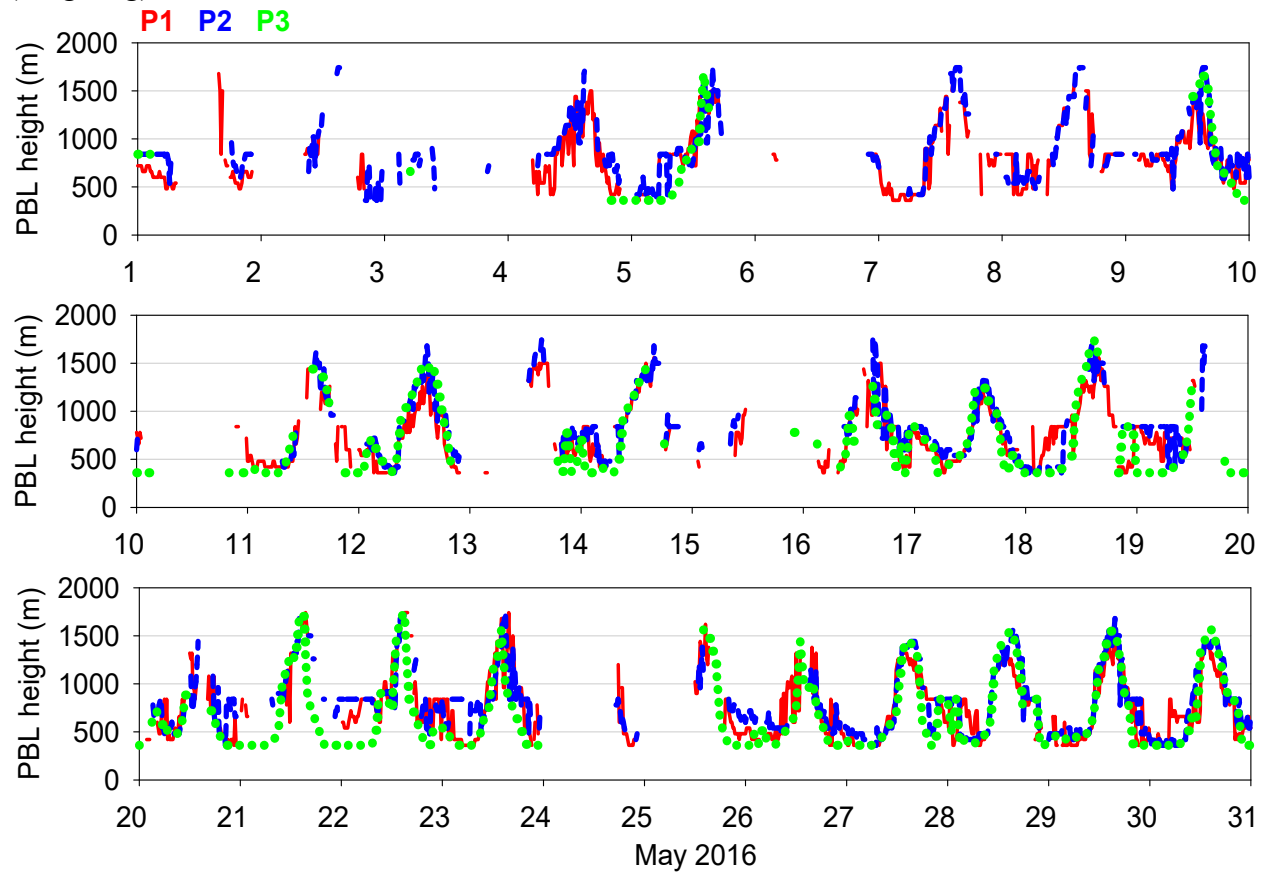

**Table S1.** Summary statistics for comparison between WRF-Chem simulations and observed PBLH at Gwanak (P1), Gwangjin (P2), and Jungnang (P3) and measured PM<sub>2.5</sub> at Seoul-Bulgwang.

| Species                                                         | Statistical Parameters | Model (YSU) | Model (ACM2) | Model (MYJ) |
|-----------------------------------------------------------------|------------------------|-------------|--------------|-------------|
| <b>PBLH<br/>at Gwanak<br/>(meter)</b>                           | Mean                   | 592.09      | 711.68       | 657.59      |
|                                                                 | R                      | 0.73        | 0.74         | 0.67        |
|                                                                 | IOA                    | 0.76        | 0.73         | 0.72        |
|                                                                 | RMSE                   | 417.32      | 501.72       | 366.95      |
|                                                                 | MB                     | -189.97     | -70.38       | -124.48     |
|                                                                 | NMB                    | -0.24       | -0.09        | -0.16       |
|                                                                 | NME                    | 0.43        | 0.52         | 0.47        |
| <b>PBLH<br/>at Gwangjin<br/>(m)</b>                             | Mean                   | 660.94      | 770.74       | 718.80      |
|                                                                 | R                      | 0.74        | 0.74         | 0.67        |
|                                                                 | IOA                    | 0.75        | 0.73         | 0.70        |
|                                                                 | RMSE                   | 461.60      | 543.04       | 522.41      |
|                                                                 | MB                     | -176.81     | -67.01       | -118.95     |
|                                                                 | NMB                    | -0.21       | -0.08        | -0.14       |
|                                                                 | NME                    | 0.45        | 0.54         | 0.50        |
| <b>PBLH<br/>at Jungnang<br/>(m)</b>                             | Mean                   | 621.23      | 735.65       | 696.28      |
|                                                                 | R                      | 0.78        | 0.79         | 0.72        |
|                                                                 | IOA                    | 0.81        | 0.77         | 0.75        |
|                                                                 | RMSE                   | 443.54      | 560.08       | 531.86      |
|                                                                 | MB                     | -62.06      | 52.37        | 12.99       |
|                                                                 | NMB                    | -0.09       | 0.08         | 0.02        |
|                                                                 | NME                    | 0.48        | 0.62         | 0.57        |
| <b>PM<sub>2.5</sub><br/>at Bulgwang<br/>(μg m<sup>-3</sup>)</b> | Mean                   | 21.90       | 23.43        | 21.78       |
|                                                                 | R                      | 0.49        | 0.51         | 0.45        |
|                                                                 | IOA                    | 0.63        | 0.66         | 0.61        |
|                                                                 | RMSE                   | 23.25       | 22.05        | 23.60       |
|                                                                 | MB                     | -11.80      | -10.26       | -11.91      |
|                                                                 | NMB                    | -0.35       | -0.30        | -0.35       |
|                                                                 | NME                    | 0.63        | 0.66         | 0.61        |

Here, Correlation Coefficient (R) ( $=[\sum(M_i - \bar{M})(O_i - \bar{O})]/[\sum[(M_i - \bar{M})^2 \sum(O_i - \bar{O})^2]^{1/2}]$ ), Normalized Mean Error(NME) ( $=\sum |M_i - O_i|/\sum O_i$ ), Root Mean Square Error (RMSE) ( $=[\sum(M_i - O_i)^2/N]^{1/2}$ ), and Index of Agreement (IOA)( $=1 - \sum(M_i' - O_i')^2/\sum(|M_i'| - |O_i'|)^2$ ) were used. Where  $N$  is the number of pairs of observations/simulations,  $M_i$  is the simulations,  $O_i$  is the observations, and  $\bar{M}$  and  $\bar{O}$  represent the simulated and observed means, and  $M'$  and  $O'$  represent  $M_i - \bar{M}$  and  $O_i - \bar{O}$  respectively.
